# Supplementary material for: Experimental Characterization and Modeling Multifunctional Properties of Epoxy/Graphene Oxide Nanocomposites
Source: MDPI journal article supplement (doi:10.3390/polym13162831), 2021-08-23
Supplement: s1 [file s1]

# **Supporting Information**

## **Experimental Characterization and Modeling Multifunctional Properties of Epoxy/ Graphene Oxide Nanocomposites**

K. Naresh<sup>1</sup>, K.A. Khan <sup>1\*</sup>, R. Umer<sup>1</sup>

<sup>1</sup>Department of Aerospace Engineering, Khalifa University of Science and Technology, Abu Dhabi, UAE.

\*Corresponding author: kamran.khan@ku.ac.ae. *Tel.:* +971-(02) 312 3562

### **S1. Thermal properties**

#### **S1.1 Storage and loss moduli of epoxy and epoxy/GO nanocomposites**

Table S1 shows the comparison between experimental and predicted storage and loss moduli values of pristine epoxy and different weight contents of GO fillers (0.05, 0.1 and 0.2 wt%) added in the epoxy for different frequencies. From the table, the increase in initial or maximum storage modulus and  $T_g$  values and the decrease in parameters p and q are observed with the increase in frequency from 0.1 Hz to 30 Hz in all materials. The predicted values are in good agreement with the experimental results.

Table S1 Experimental and predicted storage and loss moduli values for pristine epoxy and different GO nanocomposites.

| Material       | f<br>(Hz) | Initial storage<br>modulus (GPa)<br>at 23°C |       | %error | Final storage<br>modulus (GPa)<br>at 150°C |       | %error | (E'') <sub>max</sub><br>(GPa) | (E'') <sub>max</sub><br>(GPa) | %error | Parameters |       |
|----------------|-----------|---------------------------------------------|-------|--------|--------------------------------------------|-------|--------|-------------------------------|-------------------------------|--------|------------|-------|
|                |           | Exp.                                        | Pred. |        | Exp.                                       | Pred. |        | Exp.                          | Pred.                         |        | p          | q     |
| Pristine epoxy | 0.1       | 5.356                                       | 5.211 | 2.782  | 3.951                                      | 3.788 | 4.303  | 0.612                         | 0.603                         | 1.493  | 0.127      | 2.576 |
|                | 1         | 5.475                                       | 5.327 | 2.778  | 4.020                                      | 4.076 | 1.374  | 0.637                         | 0.636                         | 0.157  | 0.121      | 2.575 |
|                | 5         | 5.521                                       | 5.361 | 2.984  | 4.076                                      | 4.061 | 0.369  | 0.592                         | 0.590                         | 0.339  | 0.092      | 2.150 |
|                | 10        | 5.552                                       | 5.395 | 2.910  | 3.948                                      | 3.959 | 0.278  | 0.616                         | 0.615                         | 0.163  | 0.091      | 2.144 |
|                | 15        | 5.569                                       | 5.411 | 2.920  | 4.192                                      | 3.737 | 12.175 | 0.659                         | 0.656                         | 0.457  | 0.090      | 2.124 |
|                | 30        | 5.602                                       | 5.475 | 2.319  | 3.814                                      | 4.309 | 11.487 | 0.550                         | 0.547                         | 0.548  | 0.086      | 1.948 |
| 0.05%<br>G/E   | 0.1       | 5.291                                       | 5.020 | 5.398  | 2.427                                      | 2.029 | 19.616 | 0.536                         | 0.522                         | 2.682  | 0.095      | 3.876 |
|                | 1         | 5.376                                       | 5.117 | 5.061  | 2.283                                      | 2.353 | 2.975  | 0.546                         | 0.545                         | 0.183  | 0.094      | 3.269 |
|                | 5         | 5.403                                       | 5.136 | 5.198  | 2.513                                      | 2.239 | 12.237 | 0.492                         | 0.489                         | 0.613  | 0.087      | 2.265 |
|                | 10        | 5.415                                       | 5.209 | 3.955  | 2.428                                      | 2.372 | 2.361  | 0.508                         | 0.505                         | 0.594  | 0.084      | 2.257 |
|                | 15        | 5.421                                       | 5.270 | 2.865  | 2.399                                      | 2.619 | 8.400  | 0.507                         | 0.505                         | 0.396  | 0.083      | 2.151 |
|                | 30        | 5.431                                       | 5.271 | 3.035  | 2.295                                      | 2.415 | 4.969  | 0.420                         | 0.420                         | 0      | 0.08       | 1.995 |
| 0.1%<br>G/E    | 0.1       | 4.629                                       | 4.498 | 2.912  | 1.566                                      | 1.481 | 5.739  | 0.488                         | 0.485                         | 0.618  | 0.103      | 2.895 |
|                | 1         | 4.718                                       | 4.598 | 2.609  | 1.802                                      | 1.702 | 5.875  | 0.443                         | 0.434                         | 2.074  | 0.099      | 2.465 |
|                | 5         | 4.741                                       | 4.612 | 2.797  | 1.766                                      | 1.727 | 2.258  | 0.429                         | 0.425                         | 0.941  | 0.098      | 2.463 |
|                | 10        | 4.751                                       | 4.622 | 2.791  | 1.789                                      | 1.766 | 1.302  | 0.441                         | 0.434                         | 1.613  | 0.097      | 2.461 |
|                | 15        | 4.759                                       | 4.597 | 3.524  | 1.996                                      | 1.874 | 6.510  | 0.472                         | 0.468                         | 0.855  | 0.087      | 2.257 |
|                | 30        | 4.77                                        | 4.592 | 3.876  | 1.871                                      | 1.914 | 2.247  | 0.469                         | 0.466                         | 0.644  | 0.084      | 1.934 |
| 0.2%<br>G/E    | 0.1       | 8.066                                       | 7.877 | 2.399  | 4.059                                      | 3.664 | 10.781 | 0.788                         | 0.780                         | 1.026  | 0.122      | 2.976 |
|                | 1         | 8.387                                       | 8.055 | 4.122  | 3.828                                      | 3.413 | 12.159 | 0.825                         | 0.816                         | 1.103  | 0.11       | 2.966 |
|                | 5         | 8.389                                       | 8.168 | 2.706  | 3.836                                      | 3.413 | 12.394 | 0.827                         | 0.817                         | 1.224  | 0.109      | 2.854 |
|                | 10        | 8.442                                       | 8.147 | 3.621  | 3.954                                      | 3.437 | 15.042 | 0.838                         | 0.828                         | 1.208  | 0.102      | 2.745 |
|                | 15        | 8.575                                       | 8.334 | 2.892  | 4.229                                      | 3.594 | 17.668 | 0.841                         | 0.832                         | 1.082  | 0.101      | 2.724 |
|                | 30        | 8.647                                       | 8.242 | 4.914  | 4.113                                      | 3.460 | 18.873 | 0.782                         | 0.830                         | 5.783  | 0.091      | 1.893 |
